# Supplementary material
Source: Research Square preprint supplement (doi:10.21203/rs.3.rs-9700661/v1)
Supplement: Supplementary file 1 [file 411750dedf7fa07bf22e37ad.pdf]

**Table 1. Comparison of theoretical predictions with experimental observations**

| Parameter                    | Theoretical prediction                 | Plant-defense system (3)                  | Soil-carbon system (4)                         | Cross-system agreement         |
|------------------------------|----------------------------------------|-------------------------------------------|------------------------------------------------|--------------------------------|
| Vacuum constant $\alpha_0$   | $\ln 2 \approx 0.693147$               | $0.70 \pm 0.05$                           | $0.693 \pm 0.02$<br>(inferred from Fe-OC lock) | < 1.5% deviation               |
| Avalanche threshold $R_c$    | $2/\ln 2 - 1/(\ln 2)^2 \approx 0.8043$ | $0.81 \pm 0.01$<br>(density transition)   | $0.804 \pm 0.01$ (month 6–12 crossing)         | < 1.0% deviation               |
| Classical boundary $\beta_1$ | $1 - \ln 2 \approx 0.3069$             | $\sim 0.31$ (pre-enrichment zone)         | $\sim 0.30$ (early mineralization phase)       | Consistent                     |
| Stabilization mechanism      | $S_1$ (hard-lock regime)               | Stable defense platform ( $S_1$ )         | Iron Gate (CFM) / Enzyme Latch (CFB)           | Two routes, one target         |
| Field equation               | $\alpha = \ln 2 + (1 - \ln 2)(Q - C)$  | Q: bacterial enrichment; C: defense decay | Q: Fe-OC formation; C: mineralization rate     | Same form, different variables |

**Note.** Theoretical values are derived analytically from Axioms I–III without empirical fitting. Experimental values for the plant-defense system were extracted from published density-response curves in Guo et al. (3). Experimental values for the soil-carbon system were extracted from published Fe-OC and mineralization time series in Ma et al. (4). The Iron Gate and Enzyme Latch routes in the soil-carbon system represent two distinct convergence mechanisms to the same locked state  $S_1$ , a classification not explicit in the original experimental reports.
